# Supplementary material
Source: Springer Nature journal article supplement (https://www.springermedizin.de/resource/supplementary/13690_2011_34_MOESM2_ESM.pdf/9422430)

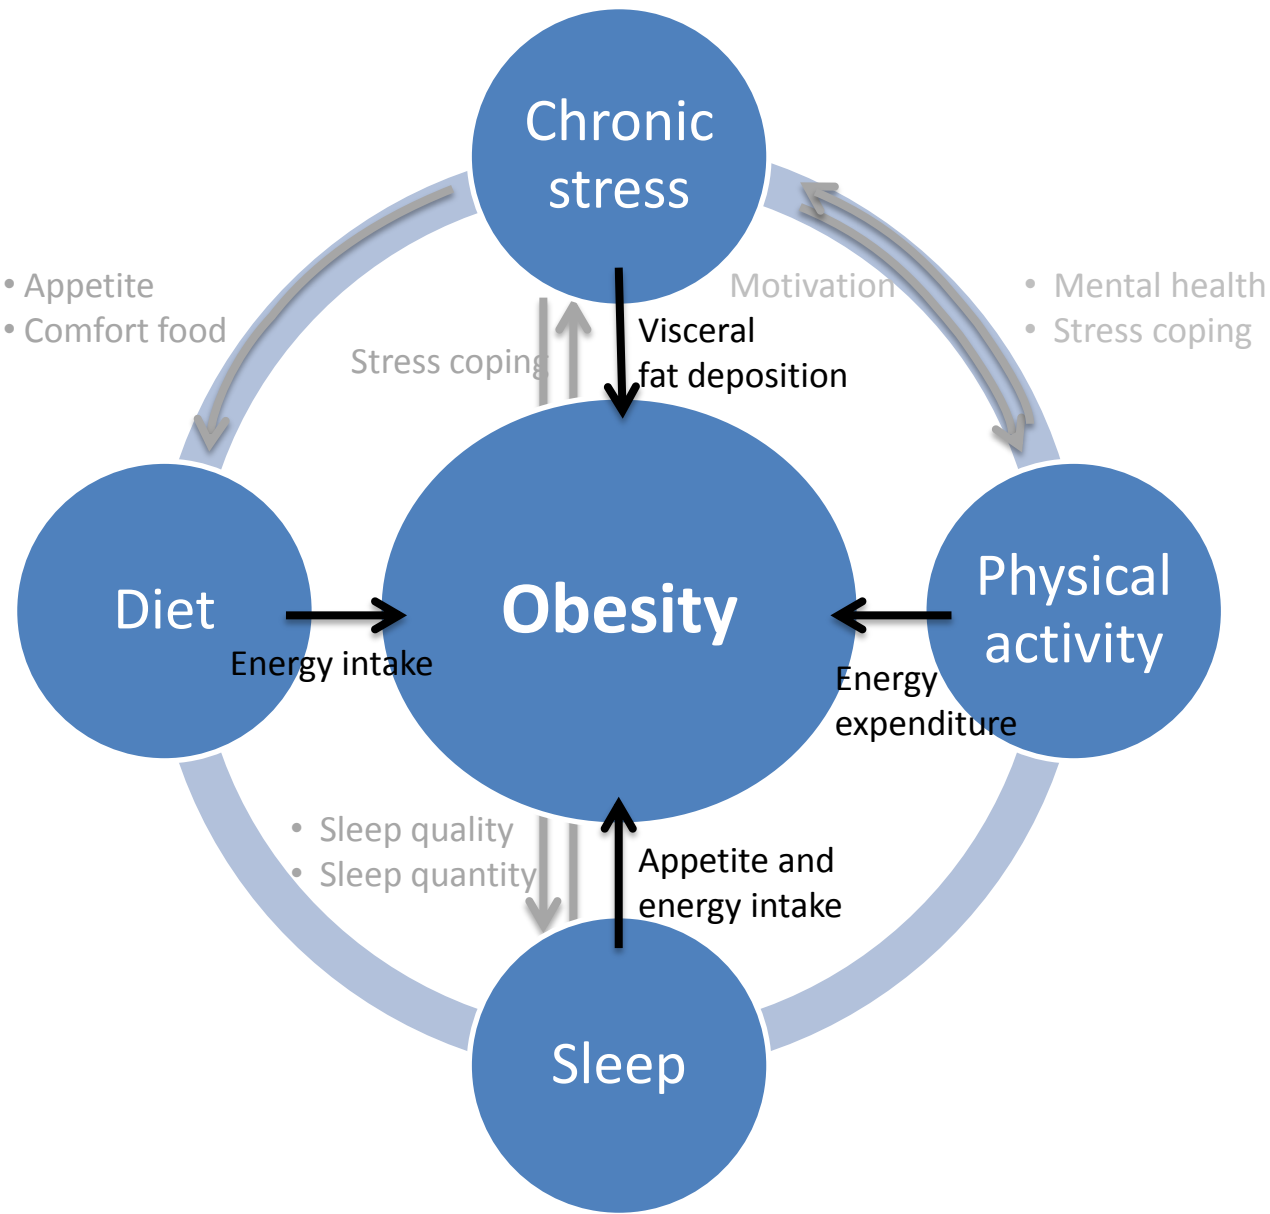

Supplement: MOESM2 [file 9422430]
